# Supplementary material
Source: Springer Nature journal article supplement (https://www.springermedizin.de/resource/supplementary/12890_2012_414_MOESM3_ESM.pdf/9505126)

A

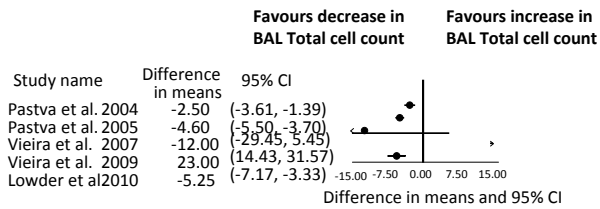

B

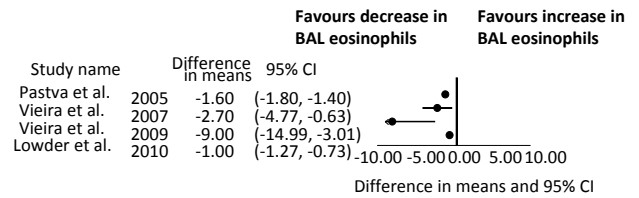

C

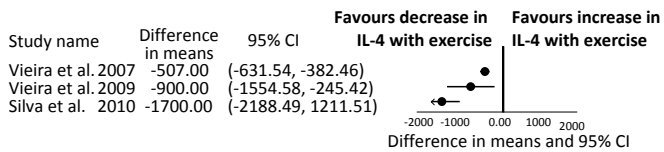

D

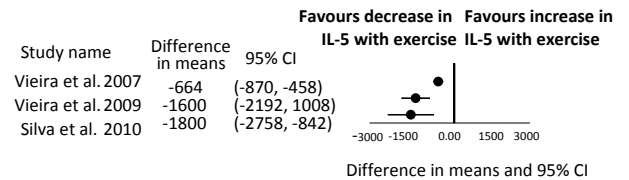

E

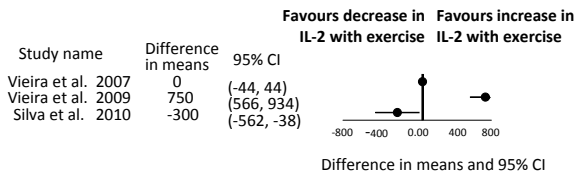

F

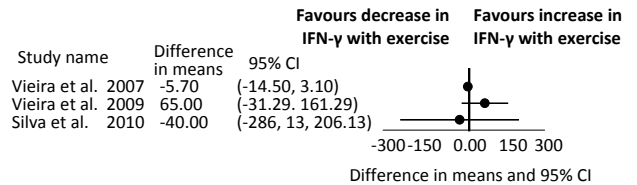

G

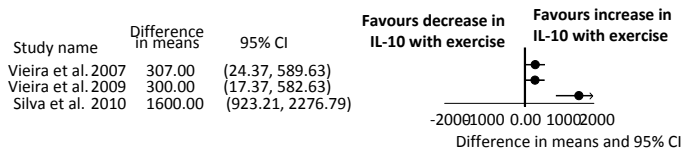

H

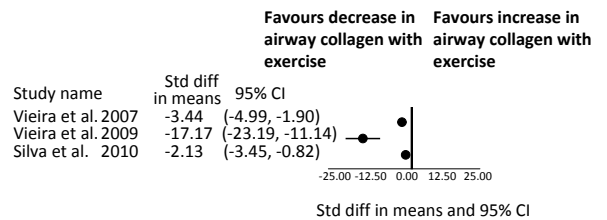

I

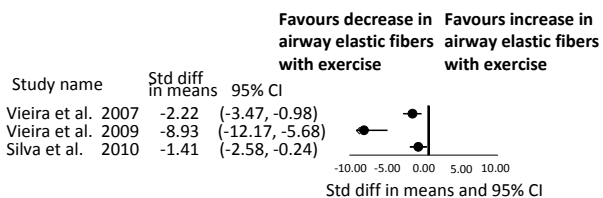

J

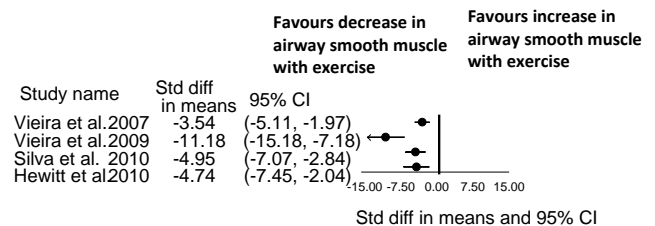

Supplement: MOESM3 [file 9505126]
